# Supplementary material for: Assessment of Changes in Serum C-Reactive Protein Levels in Patients after Ischemic Stroke Undergoing Rehabilitation—A Retrospective Observational Study
Source: MDPI journal article supplement (doi:10.3390/jcm12031029), 2023-01-29
Supplement: s1 [file s1]

**Table S1.** Univariate logistic regression analyses assessing the effect of selected variables on CRP score ( $\leq 5$  vs.  $> 5$ ).

|                         |     | Univariate logistic regression analysis |         |      |       |      |                |      |       |      |       |
|-------------------------|-----|-----------------------------------------|---------|------|-------|------|----------------|------|-------|------|-------|
|                         |     | CRP>5<br>before                         |         |      |       |      | CRP>5<br>after |      |       |      |       |
|                         |     | B                                       | p-value | OR   | CI95% | B    | p-value        | OR   | CI95% |      |       |
| Age                     |     | 0.03                                    | 0.44    | 1.03 | 0.96  | 1.09 | 0.02           | 0.58 | 1.02  | 0.94 | 1.11  |
| BMI                     |     | 0.03                                    | 0.70    | 1.03 | 0.90  | 1.18 | 0.20           | 0.05 | 1.23  | 1.00 | 1.50  |
| Time since stroke onset |     | 0.07                                    | 0.50    | 1.07 | 0.87  | 1.32 | 0.16           | 0.23 | 1.17  | 0.90 | 1.52  |
| NIHSS                   |     | -0.24                                   | 0.39    | 0.79 | 0.45  | 1.37 | -0.19          | 0.60 | 0.83  | 0.41 | 1.67  |
| Sex                     | M   |                                         |         | Ref. |       |      |                |      | Ref.  |      |       |
|                         | F   | -0.48                                   | 0.45    | 0.62 | 0.17  | 2.18 | -0.63          | 0.47 | 0.53  | 0.10 | 2.91  |
| Hypertension            | No  |                                         |         | Ref. |       |      |                |      | Ref.  |      |       |
|                         | Yes | -1.11                                   | 0.10    | 0.33 | 0.09  | 1.25 | -1.19          | 0.12 | 0.30  | 0.07 | 1.39  |
| Diabetes                | No  |                                         |         | Ref. |       |      |                |      | Ref.  |      |       |
|                         | Yes | 0.79                                    | 0.19    | 2.20 | 0.67  | 7.22 | -0.14          | 0.85 | 0.87  | 0.19 | 3.98  |
| Smoking                 | No  |                                         |         | Ref. |       |      |                |      | Ref.  |      |       |
|                         | Yes | -0.08                                   | 0.89    | 0.92 | 0.28  | 3.00 | -0.25          | 0.75 | 0.78  | 0.17 | 3.58  |
| mRS                     |     | 0.64                                    | 0.28    | 1.90 | 0.60  | 6.05 | 0.91           | 0.23 | 2.48  | 0.56 | 11.07 |
| BI                      |     | -0.01                                   | 0.94    | 0.99 | 0.68  | 1.42 | -0.29          | 0.40 | 0.75  | 0.39 | 1.46  |
| COR [nmol/l]            |     | 0.10                                    | 0.12    | 1.11 | 0.97  | 1.26 | 0.29           | 0.03 | 1.33  | 1.03 | 1.72  |
| HGB [g/dl]              |     | -0.35                                   | 0.08    | 0.71 | 0.48  | 1.04 | -0.06          | 0.81 | 0.94  | 0.56 | 1.58  |
| RBC [T/l]               |     | -1.04                                   | 0.13    | 0.35 | 0.09  | 1.34 | 0.68           | 0.40 | 1.97  | 0.41 | 9.47  |
| WBC [thous./μl]         |     | 0.07                                    | 0.60    | 1.07 | 0.83  | 1.37 | 0.20           | 0.26 | 1.22  | 0.86 | 1.72  |
| PLT [thous./μl]         |     | 0.00                                    | 0.60    | 1.00 | 0.99  | 1.01 | 0.01           | 0.27 | 1.01  | 1.00 | 1.02  |
| HTC [%]                 |     | -0.11                                   | 0.15    | 0.89 | 0.77  | 1.04 | 0.04           | 0.71 | 1.04  | 0.86 | 1.26  |

Abbreviations: BMI, body mass index; NIHSS, National Institutes of Health Stroke Scale; M, Male; F, Female; BI, Barthel Index; mRS, modified Rankin Scale; COR, cortisol; HGB, hemoglobin; RBC, red blood cell; WBC, white blood cell; PLT, plates; HCT, hematocrit. Notes: B – unstandardized regression coefficient B; OR – odds ratio; CI – confidence intervals.

**Table S2.** Multivariate logistic regression analyses assessing the effect of selected variables on CRP score ( $\leq 5$  vs.  $> 5$ ).

| Multivariate logistic regression analysis |     |                 |         |       |       |        |                |         |       |       |        |
|-------------------------------------------|-----|-----------------|---------|-------|-------|--------|----------------|---------|-------|-------|--------|
|                                           |     | CRP>5<br>before |         |       |       |        | CRP>5<br>after |         |       |       |        |
|                                           |     | B               | p-value | OR    | CI95% |        | B              | p-value | OR    | CI95% |        |
| Age                                       |     | -               | -       | -     | -     | -      | -              | -       | -     | -     | -      |
| BMI                                       |     | -               | -       | -     | -     | -      | 0.061          | 0.448   | 1.062 | 0.909 | 1.242  |
| Time since stroke onset                   |     | -               | -       | -     | -     | -      | 0.053          | 0.660   | 1.054 | 0.833 | 1.334  |
| NIHSS                                     |     | -               | -       | -     | -     | -      | -              | -       | -     | -     | -      |
| Sex                                       | M   |                 |         | -     |       |        |                |         | -     |       |        |
|                                           | F   | -               | -       | -     | -     | -      | -              | -       | -     | -     | -      |
| Hypertension                              | No  |                 |         | -     |       |        |                |         | -     |       |        |
|                                           | Yes | -0.785          | 0.365   | 0.456 | 0.084 | -0.720 | 0.347          | 0.347   | 0.487 | 0.109 | 2.180  |
| Diabetes                                  | No  |                 |         | -     |       |        |                |         | -     |       |        |
|                                           | Yes | 0.963           | 0.181   | 2.618 | 0.640 | 10.710 | -              | -       | -     | -     | -      |
| Smoking                                   | No  |                 |         | -     |       |        |                |         | Ref.  |       |        |
|                                           | Yes | -               | -       | -     | -     | -      | -              | -       | -     | -     | -      |
| mRS                                       |     | 0.401           | 0.562   | 1.493 | 0.386 | 5.771  | 1.435          | 0.071   | 4.199 | 0.885 | 19.926 |
| BI                                        |     | -               | -       | -     | -     | -      | -              | -       | -     | -     | -      |
| COR [nmol/l]                              |     | 0.078           | 0.305   | 1.081 | 0.931 | 1.256  | 0.198          | 0.093   | 1.219 | 0.967 | 1.535  |
| HGB [g/dl]                                |     | -0.298          | 0.554   | 0.742 | 0.276 | 1.995  | -              | -       | -     | -     | -      |
| RBC [T/l]                                 |     | -1.300          | 0.364   | 0.272 | 0.016 | 4.517  | -              | -       | -     | -     | -      |
| WBC [thous./ $\mu$ l]                     |     | -               | -       | -     | -     | -      | 0.005          | 0.979   | 1.005 | 0.682 | 1.483  |
| PLT [thous./ $\mu$ l]                     |     | -               | -       | -     | -     | -      | 0.006          | 0.309   | 1.006 | 0.994 | 1.018  |
| HCT [%]                                   |     | 0.130           | 0.589   | 1.139 | 0.710 | 1.829  | -              | -       | -     | -     | -      |

*Abbreviations:* BMI, body mass index; NIHSS, National Institutes of Health Stroke Scale; M, Male; F, Female; BI, Barthel Index; mRS, modified Rankin Scale; COR, cortisol; HGB, hemoglobin; RBC, red blood cell; WBC, white blood cell; PLT, plates; HCT, hematocrit. *Notes:* B – unstandardized regression coefficient B; OR – odds ratio; CI – confidence intervals.
